P334

### Prospective FU in various subtypes of cardiomyopathies: insights from the EORP Cardiomyopathy Registry of the ESC

J.R. Gimeno Blanes<sup>1</sup>, P.M. Elliott<sup>2</sup>, L. Tavazzi<sup>3</sup>, M. Tendera<sup>4</sup>, J.P. Kaski<sup>5</sup>, C. Laroche<sup>6</sup>, A. Maggioni<sup>6</sup>, A. Caforio<sup>7</sup>, P.H. Charron<sup>8</sup>

<sup>1</sup>Hospital Clinico Universitario Virgen de la Arrixaca, Murcia, Spain; <sup>2</sup>Barts and the Heart Hospital NHS Trust, Cardiology, London, United Kingdom;

<sup>3</sup>GVM Care and Research, E.S. Health Science Foundation, Maria Cecilia Hospital, Cardiology, Cotignola, Italy; <sup>4</sup>Medical University of Silesia, Cardiology, Katowice, Poland; <sup>5</sup>Great Ormond Street Hospital for Children, Cardiology, London, United Kingdom; <sup>6</sup>European Society of Cardiology, EURObservational Research Programme, Sophia-Antipolis, France; <sup>7</sup>University of Padova, Cardiology, Padua, Italy; <sup>8</sup>Hospital Pitie-Salpetriere,

Centre de Référence des Maladies Cardiaques Héritaires, Paris, France  
On behalf of EORP Cardiomyopathy and Myocarditis Registry Investigators

**Funding Acknowledgement:** None

**Background:** The EORP Cardiomyopathy Registry is a prospective, observational, multinational registry of consecutive patients with cardiomyopathies. The objective of this report is to describe the outcomes at one year of follow-up of adult patients (> 18 years old) enrolled in the registry.

**Methods:** A total of 3,208 patients (median age: 55.0 (43.0; 64.0) years, males: 65.1%) were recruited at baseline. Follow-up data at 1 year were obtained in 2,713 patients (84.6%), including 1,420 with hypertrophic (HCM), 1,105 dilated (DCM), 128 arrhythmogenic right ventricular (ARVC) and 60 restrictive cardiomyopathy (RCM).

**Results:** Improvement of symptoms (NYHA, chest pain, syncope) was globally observed over time ( $p < 0.001$  for each). Additional invasive therapeutics were performed during follow-up: implantation of ICD (primary prevention) (N=109 patients, 5.2%), pacemaker (N=28, 1.2%), heart transplant (N=30, 1.1%), ablation for atrial or ventricular arrhythmia (0.5% & 0.1%). The proportion of patients with history of AF increased from base-

line to FU in 3.6% (from 28.2% to 31.8%). ICD therapy at 1 year was delivered more frequently in ARVC then in DCM, HCM and RCM (11.4%, 9.0%; 8.1%, 0% respectively for primary prevention). Major cardiovascular events (MACE) occurred in 29.3% of RCM, 10.5% of DCM, 7.9% of ARVC and 5.3% of HCM. MACE were globally higher in index patients compared to relatives (10.8% vs 4.4%,  $p < 0.001$ ).

When considering geographical areas, MACE were higher in East Europe (13.1%) and lower in South Europe (5.3%) (univariate); heart transplant was higher in West Europe (2.40%) and lower in South Europe (0.25%) (univariate).

**Conclusions:** Despite symptomatic improvement in most cases, there is still a significant burden of arrhythmic and heart failure events in patients with cardiomyopathies. Outcomes were different not only according to cardiomyopathy subtypes but also in relatives versus index patients.
